# Supplementary material
Source: PubMed Central journal article supplement (PMC3926790)
Supplement: supp_the2013-0137_Shen-13137.pdf [file supp_the2013-0137_Shen-13137.pdf]

## Overview

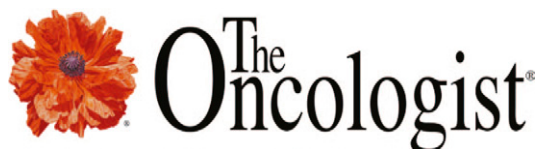

The official journal of the Society for Translational Oncology

**First Published Online January 23, 2014**

**DOI:** 10.1634/theoncologist.2013-0137

**Title:** The Multicenter, Phase II Prospective Study of Paclitaxel Plus Capecitabine as First-Line Chemotherapy in Advanced Gastric Carcinoma

**Authors:** Jifang Gong,<sup>a</sup> Bing Hu,<sup>b</sup> Xiaotian Zhang,<sup>a</sup> Fengchun Zhang,<sup>c</sup> Jun Zhang,<sup>d</sup> Nong Xu,<sup>e</sup> Qingxia Fan,<sup>e</sup> Yuxian Bai,<sup>f</sup> Shunchang Jiao,<sup>g</sup> Jinwan Wang,<sup>h</sup> Chunmei Bai,<sup>i</sup> Leizhen Zheng,<sup>j</sup> Yingqiang Shi,<sup>k</sup> Yunpeng Liu,<sup>l</sup> Jun Liang,<sup>m</sup> Guoqing Hu,<sup>n</sup> Ying Cheng,<sup>o</sup> Ruihua Xu,<sup>p</sup> Yu Bai,<sup>q</sup> Lin Shen<sup>a</sup>

<sup>a</sup>Peking University Cancer Hospital and Institute, Beijing, China; <sup>b</sup>Anhui Provincial Hospital, Hefei, China; <sup>c</sup>Suzhou Kowloon Hospital, Suzhou, China; <sup>d</sup>Ruijin Hospital, Shanghai, China; <sup>e</sup>First Affiliated Hospital of Zhengzhou University, Henan, China; <sup>f</sup>Cancer Hospital, Harbin Medical University, Harbin, China; <sup>g</sup>General Hospital of the Chinese People's Liberation Army, Beijing, China; <sup>h</sup>Cancer Institute and Hospital, Chinese Academy of Medical Sciences, Beijing, China; <sup>i</sup>Peking Union Medical College Hospital, Beijing, China; <sup>j</sup>Xinhua Hospital, Shanghai Jiao Tong University School of Medicine, Shanghai, China; <sup>k</sup>Shanghai Cancer Center, Fudan University, Shanghai, China; <sup>l</sup>First Hospital, China Medical University, Shenyang, China; <sup>m</sup>The Affiliated Hospital of the Medical College of Qingdao University, Qingdao, China; <sup>n</sup>Tongji Hospital, Tongji Medical College, Wuhan, China; <sup>o</sup>Jilin Provincial Tumor Hospital, Changchun, China; <sup>p</sup>Sun Yat-sen University Cancer Center, Guangzhou, China; <sup>q</sup>Peking University First Hospital, Beijing, China

**Chinese Clinical Trial Registry:** ChiCTR-TRC-07000014

**Sponsor(s):** Lin Shen

**Principal Investigator:** Lin Shen

**IRB Approved:** Yes

### Disclosures

The authors indicated no financial relationships.

## Author Summary: Abstract and Brief Discussion

### Background

The efficacy and toxicity of paclitaxel plus capecitabine (PX) as first-line treatment in advanced gastric cancer (AGC) was evaluated.

### Methods

Patients with previously untreated AGC were included. PX was given every 3 weeks until a maximum of six cycles or progression. Capecitabine monotherapy was continued for patients without disease progression. The primary endpoint was progression-free survival, and secondary endpoints were objective response rate, overall survival (OS), and safety.

### Results

Overall, 194 patients were treated per protocol and one patient was excluded because of allergy to paclitaxel. Response was evaluated in 175 patients, with an objective response rate of 34.8%. After a median follow-up of 33.2 months, disease progression was observed in 141 patients, 137 died, and 16 were lost to follow-up, with progression-free survival of 188 days and OS of 354 days. In multivariate Cox regression analysis, no factor remained an independent predictor of OS. Forty-five patients who received capecitabine monotherapy after PX had longer OS (531 days). Adverse events were mild, and the most common grade 3–4 toxicities were leucopenia and neutropenia.

## Conclusion

PX as a first-line treatment has promising efficacy in AGC. Based on these data, a phase III study has been launched for further investigation.

## Discussion

Chemotherapy can improve survival and quality of life for patients with AGC. The V325 trial established that docetaxel plus 5-fluorouracil and cisplatin would benefit AGC patients; however, a high rate of hematologic toxicity limits the use of the combination regimen. Paclitaxel has good tolerability and efficacy similar to docetaxel. In addition, paclitaxel has synergistic effects with capecitabine. After approval by the ethics committee, we initiated this multicenter, phase II, prospective trial to evaluate the efficacy and toxicity of PX as first-line treatment in AGC.

Overall, 195 patients were enrolled at 18 centers; 175 patients were evaluable for clinical response. The response rate was 34.8%, and the median overall survival was nearly 1 year (Fig. 1). These efficacy data were similar to docetaxel plus 5-fluorouracil and cisplatin in the V325 trial. Adverse events were well tolerated. The occurrence of grade 3–4 neutropenia decreased to less than 10%. The most common nonhematologic toxicity was alopecia. Although paclitaxel-related neurotoxicity was observed, most cases were mild and reversible under the weekly schedule. No patients discontinued protocol treatment because of paclitaxel-related neuropathy.

In vitro models showed that taxanes can upregulate thymidine phosphorylase activity within 4 days with the maximal effect at about 6–8 days after the treatment. Consequently, a weekly schedule of paclitaxel could provide a synergistic effect in combination with capecitabine. Our results demonstrated that the toxicity of this protocol is generally well tolerated. In our study, there was no modification per protocol for elderly patients, and no severe adverse events occurred during the treatment.

The consensus about the number of palliative chemotherapy cycles that should be performed has not yet been reached. Nevertheless, in clinical practice, tolerability often precludes continuing combination chemotherapy until progression. Furthermore, maintenance chemotherapy has shown benefit in colorectal cancer and lung cancer. We explored maintenance therapy in patients with gastric cancer. In this trial, a subset of 45 patients who continued with the capecitabine monotherapy without disease progression after combination therapy seemed to have obtained longer survival benefit (531 days). Hand-foot syndrome was the main toxicity that restricted the use of capecitabine.

In summary, we can conclude that the efficacy and tolerability of PX observed in our study deserves further investigation in a phase III trial (ClinicalTrials.gov identifier NCT01015339).

## Acknowledgements

This work was supported by National Natural Science Foundation of China (No. 81172110), National High Technology Research and Development Program (No. 2006AA 02A 402-B02, 2012AA 02A 504), and Beijing Municipal Science & Technology Commission Program (No. Z11110706730000). Jifang Gong and Bing Hu contributed equally to this manuscript.

## Trial Information

|                                                         |                                                                                                                                                                                                                                                                                                                                                                                                                                                                                                                                                                                                                                      |
|---------------------------------------------------------|--------------------------------------------------------------------------------------------------------------------------------------------------------------------------------------------------------------------------------------------------------------------------------------------------------------------------------------------------------------------------------------------------------------------------------------------------------------------------------------------------------------------------------------------------------------------------------------------------------------------------------------|
| <b>Disease:</b>                                         | Gastric cancer                                                                                                                                                                                                                                                                                                                                                                                                                                                                                                                                                                                                                       |
| <b>Stage of disease / treatment:</b>                    | Metastatic / Advanced                                                                                                                                                                                                                                                                                                                                                                                                                                                                                                                                                                                                                |
| <b>Prior Therapy:</b>                                   | None                                                                                                                                                                                                                                                                                                                                                                                                                                                                                                                                                                                                                                 |
| <b>Type of study - 1:</b>                               | Phase II                                                                                                                                                                                                                                                                                                                                                                                                                                                                                                                                                                                                                             |
| <b>Type of study - 2:</b>                               | Single Arm                                                                                                                                                                                                                                                                                                                                                                                                                                                                                                                                                                                                                           |
| <b>Primary Endpoint:</b>                                | Progression-Free Survival                                                                                                                                                                                                                                                                                                                                                                                                                                                                                                                                                                                                            |
| <b>Secondary Endpoint:</b>                              | Overall Response Rate                                                                                                                                                                                                                                                                                                                                                                                                                                                                                                                                                                                                                |
| <b>Secondary Endpoint:</b>                              | Overall Survival                                                                                                                                                                                                                                                                                                                                                                                                                                                                                                                                                                                                                     |
| <b>Additional Details of Endpoints or Study Design:</b> | In this multicenter, open-label, phase II, prospective clinical trial, the primary objective was to evaluate progression-free survival. The secondary objectives included the analysis of response rate, overall survival, and occurrence of adverse events. PFS was calculated from the first day of chemotherapy until the date of progression or date of death, whichever occurred first. The censoring date would be the last date of follow-up or last tumor measurement. Overall survival was calculated from the patient-signed informed consent until death or last date of follow-up. Progression-free survival and overall |

survival curves were generated using the Kaplan–Meier method. In univariate analysis, survival rates were compared using the log-rank test. In multivariate analysis, independent prognostic factors were determined by the Cox proportional hazards model. A *p* value of <.05 was considered statistically significant. SPSS version 16.0 was used for all analyses. Tumor response was evaluated according to the Response Evaluation Criteria In Solid Tumors (RECIST) 1.0. Target lesions were measured by imaging studies (including computed tomography scan and/or magnetic resonance imaging) every two cycles or when there were any clinical signs of possible tumor progression. Tumor responses were confirmed by a second imaging study 4 weeks after initial response. Patients' conditions and treatment-related toxicities were evaluated weekly and were graded using the toxicity criteria of the National Cancer Institute (NCI CTC version 3.0).

**Investigator's Analysis:** Active and should be pursued further.

## Drug Information

**Generic/Working name:** Paclitaxel

**Drug type:** Small molecule

**Drug class:** Tubulin / Microtubules targeting agent

**Dose:** 80 mg/m<sup>2</sup>

**Route:** IV

**Schedule of Administration:** Days 1 and 8 of a 21-day cycle. Cycles were repeated every 3 weeks until progression or for a maximum six cycles or until occurrence of adverse events or until withdrawal of consent.

### Drug 2:

**Generic/Working name:** Capecitabine

**Drug type:** Small molecule

**Drug class:** Antimetabolite

**Dose:** 1,000 mg/m<sup>2</sup>

**Route:** Oral (po)

**Schedule of Administration:** Day 1 of three 3-week cycles preoperatively and three cycles postoperatively

### Drug 3:

**Generic/Working name:** Capecitabine

**Trade name:** Xeloda

**Company name:** Roche

**Drug type:** Other

**Drug class:** Antimetabolite

**Dose:** 1,250 mg/m<sup>2</sup>

**Route:** oral (p.o.)

**Schedule of Administration:** Twice a day on days 1–14 of a 21-day cycle. Cycles were repeated every 3 weeks until progression or for a maximum of six cycles or until occurrence of adverse events (AEs) or until withdrawal of consent. Capecitabine monotherapy (same as the combination stage) was recommended as maintenance therapy until progression or occurrence of unendurable adverse events for patients without disease progression.

## Patient Characteristics

Number of patients, male: 127

Number of patients, female: 68

Stage: III or IV

|                                     |                                                                                                                                                                                                                                                                                               |
|-------------------------------------|-----------------------------------------------------------------------------------------------------------------------------------------------------------------------------------------------------------------------------------------------------------------------------------------------|
| Age:                                | Median (range): 59 (23–80)                                                                                                                                                                                                                                                                    |
| Number of prior systemic therapies: | Median (range): 0 (0)                                                                                                                                                                                                                                                                         |
| Performance Status:                 | ECOG                                                                                                                                                                                                                                                                                          |
|                                     | 0 —                                                                                                                                                                                                                                                                                           |
|                                     | 1 —                                                                                                                                                                                                                                                                                           |
|                                     | 2 —                                                                                                                                                                                                                                                                                           |
|                                     | 3 —                                                                                                                                                                                                                                                                                           |
|                                     | unknown—                                                                                                                                                                                                                                                                                      |
| Other:                              | From December 6, 2006, to April 28, 2010, 195 patients from 18 centers were enrolled in this study. Overall, 194 patients were treated per protocol, and 1 patient was withdrawn from the trial because of allergy to paclitaxel. Median Karnofsky performance status was 80 (range: 70–100). |

#### Cancer Types or Histologic Subtypes

|                                                |     |
|------------------------------------------------|-----|
| Well-moderately differentiated adenocarcinoma: | 52  |
| Poorly differentiated adenocarcinoma:          | 143 |

## Primary Assessment Method

### Experimental Arm: Total Patient Population

|                                            |                                            |
|--------------------------------------------|--------------------------------------------|
| Number of patients screened:               | 195                                        |
| Number of patients enrolled:               | 195                                        |
| Number of patients evaluable for toxicity: | 195                                        |
| Number of patients evaluated for efficacy: | 175                                        |
| Evaluation method:                         | RECIST 1.0                                 |
| Response assessment CR:                    | 1.0%                                       |
| Response assessment PR:                    | 33.8%                                      |
| Response assessment SD:                    | 41.0%                                      |
| Response assessment PD:                    | 13.8%                                      |
| Response assessment other:                 | 10.3%                                      |
| (Median) duration assessments PFS          | 188 days, confidence interval: 150.2–225.8 |
| (Median) duration assessments OS           | 354 days, confidence interval: 307.7–400.3 |

## Adverse Events

| Name                                                      | *NC/NA                                    | 1   | 2   | 3   | 4  | 5  | All Grades |
|-----------------------------------------------------------|-------------------------------------------|-----|-----|-----|----|----|------------|
|                                                           | *No Change from Baseline/No Adverse Event |     |     |     |    |    |            |
| Leukocytes (total WBC)                                    | 44%                                       | 23% | 17% | 11% | 3% | 0% | 55%        |
| Neutrophils/granulocytes (ANC/AGC)                        | 58%                                       | 17% | 14% | 5%  | 3% | 0% | 41%        |
| Hemoglobin                                                | 85%                                       | 10% | 3%  | 1%  | 0% | 0% | 14%        |
| Platelets                                                 | 88%                                       | 7%  | 2%  | 1%  | 0% | 0% | 11%        |
| Hair loss/alopecia (scalp or body)                        | 64%                                       | 21% | 13% | 0%  | 0% | 0% | 35%        |
| Fatigue (asthenia, lethargy, malaise)                     | 78%                                       | 6%  | 7%  | 7%  | 0% | 0% | 21%        |
| Nausea                                                    | 65%                                       | 17% | 11% | 4%  | 1% | 0% | 34%        |
| Rash: hand-foot skin reaction                             | 76%                                       | 6%  | 11% | 5%  | 0% | 0% | 23%        |
| Neuropathy: sensory                                       | 83%                                       | 4%  | 8%  | 4%  | 0% | 0% | 16%        |
| Diarrhea                                                  | 83%                                       | 6%  | 6%  | 3%  | 0% | 0% | 16%        |
| ALT, SGPT (serum glutamic pyruvic transaminase)           | 86%                                       | 7%  | 3%  | 2%  | 1% | 0% | 13%        |
| Mucositis/stomatitis (clinical exam)                      | 92%                                       | 5%  | 1%  | 0%  | 0% | 0% | 7%         |
| Allergic reaction/hypersensitivity (including drug fever) | 99%                                       | 0%  | 0%  | 0%  | 0% | 0% | 0%         |

Ventricular arrhythmia 98% 0% 0% 1% 0% 0% 1%  
\*No Change from Baseline/No Adverse Event

## Assessment, Analysis, and Discussion

|                                             |                                       |
|---------------------------------------------|---------------------------------------|
| <b>Completion:</b>                          | Study completed                       |
| <b>Pharmacokinetics / Pharmacodynamics:</b> | Not Collected                         |
| <b>Investigator's Assessment:</b>           | Active and should be pursued further. |

### Discussion

Although the prognosis of advanced gastric cancer (AGC) patients is very poor, chemotherapy can improve survival and quality of life for these patients [1, 2]. In the V325 trial, docetaxel plus 5-fluorouracil (5-FU) and cisplatin provided a small but statistically significant survival benefit in AGC. A high rate of hematologic toxicity, however, limits the use of this triplet combination regimen [3]. Paclitaxel, the prototype taxane compound that interferes with tubulin assembly, has a similar effect but seemed to be more tolerable than docetaxel in a phase II study when combined with 5-FU as first-line chemotherapy in patients with AGC [4]. Capecitabine is an oral fluoropyrimidine with good tolerability, designed to deliver 5-FU selectively to tumor tissues via thymidine phosphorylase metabolism [5–7]. From the meta-analysis of the ML17032 and REAL2 trials, patients with gastric cancer could benefit more from capecitabine than from 5-FU [8]. Paclitaxel and capecitabine (PX) have synergistic effects because paclitaxel can upregulate TP to increase the intratumor concentration of 5-FU [9]. In addition, their toxicity profiles are different. Consequently, we have initiated a multicenter, phase II, prospective clinical trial to evaluate the efficacy and safety of PX as first-line treatment for AGC.

The results of our study show that PX has good efficacy as first-line chemotherapy in AGC. For the intent-to-treat population, the response rate observed in our study was 34.8%, and overall survival (OS) was nearly 1 year (Fig. 1). These efficacy data were similar to docetaxel plus 5-FU and cisplatin in the V325 trial. In addition, this efficacy was also comparable with titanium silicate 1 plus cisplatin in a controlled phase III trial by Jin et al. [10]. In the subgroup of patients who obtained clinical benefits (complete response plus partial response plus stable disease), the median OS was statistically longer than those with no clinical benefit from this regimen. (392.0 days vs. 219 days,  $p = .000$ ; Fig. 2). After chemotherapy, 15 patients with initially inoperable advanced disease underwent radical resection. There were no serious perioperative complications; the patients recovered well from surgery and had much longer survival (data not shown). In our study, we could not distinguish which group of patients could benefit more from this regimen; therefore, translational research to explore the pharmacogenetic status of these patients might prove useful in further stratification of patients.

In contrast, the toxicities observed in our study were lower than those observed in other doublet regimens and clearly improved when compared with the triplet regimen. The occurrence of grade 3–4 neutropenia decreased to less than 10%. The most common nonhematologic toxicity in our study was alopecia. Although paclitaxel-related neurotoxicity was observed, most cases were mild and reversible under the weekly schedule. No patients discontinued protocol treatment because of paclitaxel-related neuropathy. In vitro models have shown that taxanes can upregulate thymidine phosphorylase activity within 4 days, with the maximal effect at about 6–8 days after the treatment [9]. Consequently, a weekly schedule of paclitaxel could provide a synergistic effect in combination therapy with capecitabine. Our results demonstrated that the toxicity of this protocol is generally well tolerated. In our study, there was no modification per protocol for patients older than 65 years. These patients had good tolerance, and no severe adverse events occurred during the treatment. Because the incidence of gastric cancer is steadily increasing among elderly patients, PX could be a treatment option for this subpopulation of patients with gastric cancer.

Consensus about the number of palliative chemotherapy cycles that should be performed has not yet been reached. The majority of oncologists prefer to give chemotherapy until progression or intolerance to maintain response. Nevertheless, in clinical practice, it is difficult to continue combination chemotherapy with good tolerance until disease progression. Consequently, it is vital to prolong progression-free survival with good tolerance. Maintenance chemotherapy has shown more benefit in colorectal cancer [11] and lung cancer [12]. Gastric cancer patients diagnosed at an advanced stage generally have poor physiological status, and there is no convincing evidence to show the benefit of maintenance therapy in AGC; therefore, it seems worthwhile to explore this treatment model in gastric cancer patients. In this trial, 45 patients who continued with capecitabine monotherapy with clinical benefit (complete response plus partial response plus stable disease) after combination therapy seemed to obtain a longer survival benefit. Hand-foot syndrome was the main toxicity effect that restricted the use of capecitabine.

The incidence of proximal gastric cancer is increasing and usually has a poorer prognosis than gastric cancer with distal localization. In addition, retrospective analysis suggested that patients with proximal gastric adenocarcinoma would benefit more from chemotherapy [13, 14]. Although the design of our study did not include as a primary objective the efficacy testing of PX in relation to primary tumor localization, we collected the data for primary tumors according to the Japanese Classification of Gastric Carcinoma [15] to do further analysis. We found that patients with proximal gastric tumors seemed to obtain longer progression-free survival (259 days vs. 168 days,  $p = .053$ ) than patients with distal tumors, but no difference in OS was observed.

In conclusion, our study was a large-sample, multicenter, phase II clinical trial that aimed to explore the efficacy and safety of PX in the first-line treatment of AGC. Our findings suggest that this regimen has good efficacy and tolerance and thus could be a choice for chemotherapy-naïve gastric cancer patients. Based on the preliminary data of this study, a phase III study has been launched for further investigation (ClinicalTrials.gov identifier NCT01015339).

## References

1. Pyrhönen S, Kuitunen T, Nyandoto P et al. Randomised comparison of fluorouracil, epidoxorubicin and methotrexate (FEMTX) plus supportive care with supportive care alone in patients with non-resectable gastric cancer. *Br J Cancer* 1995;**71**:587–591.
2. Glimelius B, Ekström K, Hoffman K et al. Randomized comparison between chemotherapy plus best supportive care with best supportive care in advanced gastric cancer. *Ann Oncol* 1997;**8**:163–168.
3. Van Cutsem E, Moiseyenko VM, Tjulandin S et al; V325 Study Group. Phase III study of docetaxel and cisplatin and fluorouracil as first-line therapy for advanced gastric cancer: A report of the V325 Study Group. *J Clin Oncol* 2006;**24**:4991–4997.
4. Park SH, Lee WK, Chung M et al. Paclitaxel versus docetaxel for advanced gastric cancer: A randomized phase II trial in combination with infusional 5-fluorouracil. *Anticancer Drugs* 2006;**17**:225–229.
5. Ishitsuka H. Capecitabine: Preclinical pharmacology studies. *Invest New Drugs* 2000;**18**:343–354.
6. Miwa M, Ura M, Nishida M et al. Design of a novel oral fluoropyrimidine carbamate, capecitabine, which generates 5-fluorouracil selectively in tumours by enzymes concentrated in human liver and cancer tissue. *Eur J Cancer* 1998;**34**:1274–1281.
7. Reigner B, Blesch K, Weidekamm E. Clinical pharmacokinetics of capecitabine. *Clin Pharmacokinet* 2001;**40**:85–104.
8. Okines AFC, Norman AR, McCloud P et al. Meta-analysis of the REAL-2 and ML17032 trials: Evaluating capecitabine-based combination chemotherapy and infused 5-fluorouracil-based combination chemotherapy for the treatment of advanced oesophago-gastric cancer. *Ann Oncol* 2009;**20**:1529–1534.
9. Sawada N, Ishikawa T, Fukase Y et al. Induction of thymidine phosphorylase activity and enhancement of capecitabine efficacy by taxol/taxotere in human cancer xenografts. *Clin Cancer Res* 1998;**4**:1013–1019.
10. Jin ML, Lu HS, Li J et al. Randomized 3-armed phase III study of S-1 monotherapy versus S-1/CDDP (SP) versus 5-FU/CDDP (FP) in patients (pts) with advanced gastric cancer (AGC): SC-101 study. *J Clin Oncol* 2008;**26**(Suppl):4533a.
11. Tournigand C, Cervantes A, Figuer A et al. OPTIMOX1: A randomized study of FOLFOX4 or FOLFOX7 with oxaliplatin in a stop-and-Go fashion in advanced colorectal cancer—a GERCOR study. *J Clin Oncol* 2006;**24**:394–400.
12. Ciuleanu T, Brodowicz T, Zielinski C et al. Maintenance pemetrexed plus best supportive care versus placebo plus best supportive care for non-small-cell lung cancer: A randomised, double-blind, phase 3 study. *Lancet* 2009;**374**:1432–1440.
13. Reim D, Gertler R, Novotny A et al. Adenocarcinomas of the esophagogastric junction are more likely to respond to preoperative chemotherapy than distal gastric cancer. *Ann Surg Oncol* 2012;**19**:2108–2118.
14. Wilkinson NW, Howe J, Gay G et al. Differences in the pattern of presentation and treatment of proximal and distal gastric cancer: Results of the 2001 gastric patient care evaluation. *Ann Surg Oncol* 2008;**15**:1644–1650.
15. Japanese Gastric Cancer Association. Japanese Classification of Gastric Carcinoma - 2nd English edition. *Gastric Cancer* 1998;**1**:10–24.

## Figures and Tables

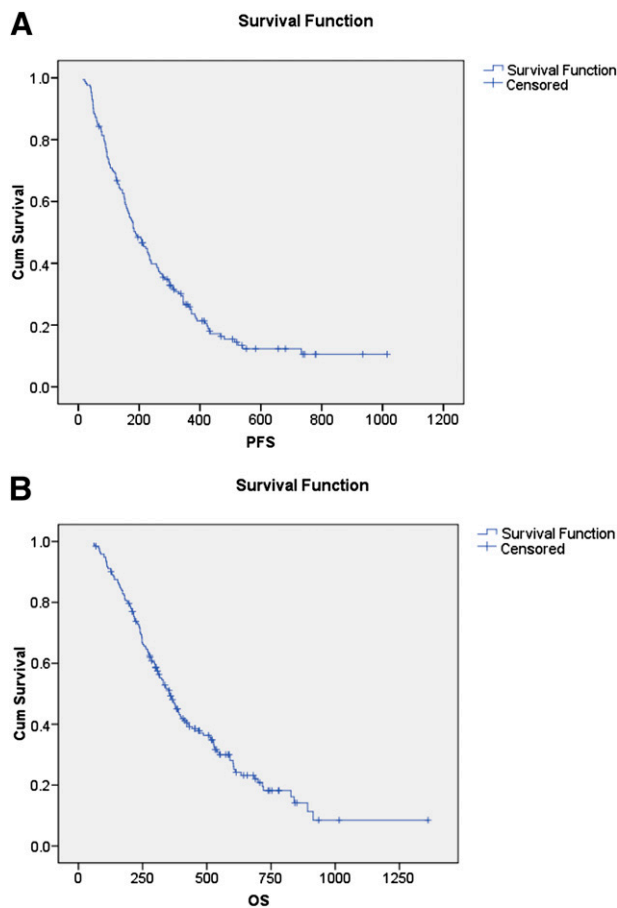

**Figure 1.** Kaplan-Meier-estimated PFS (A) and OS (B), in days, in all patients.  
Abbreviations: Cum, cumulative; OS, overall survival; PFS, progression-free survival.

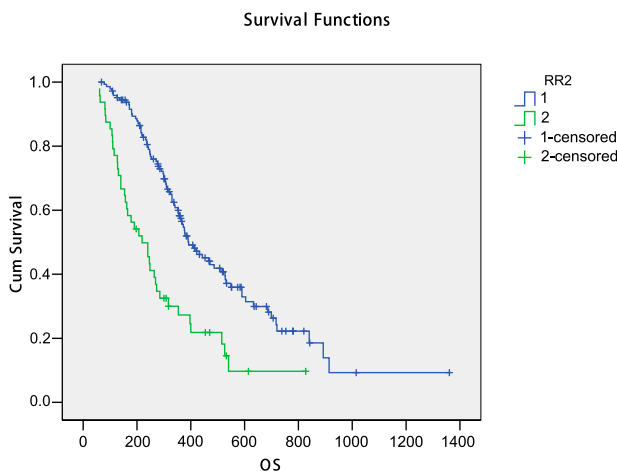

**Figure 2.** Patients with clinical benefit (complete response or partial response or stable disease) obtained longer OS than those without a clinical benefit (392.0 days vs. 219 days,  $p = .000$ ).  
Abbreviations: Cum, cumulative; OS, overall survival; RR2, second response rate.

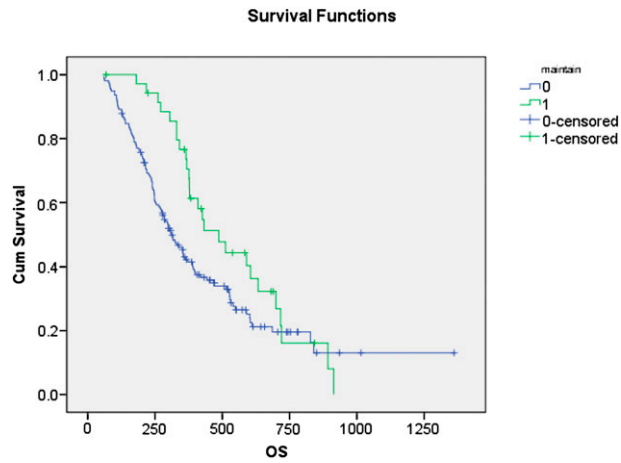

**Figure 3.** A total of 45 patients completed the combination treatment without disease progression and then entered a capecitabine monotherapy stage. These patients seemed to have longer median OS than the group with CR/PR/SD (531 days vs. 392 days,  $p=0.26$ ).

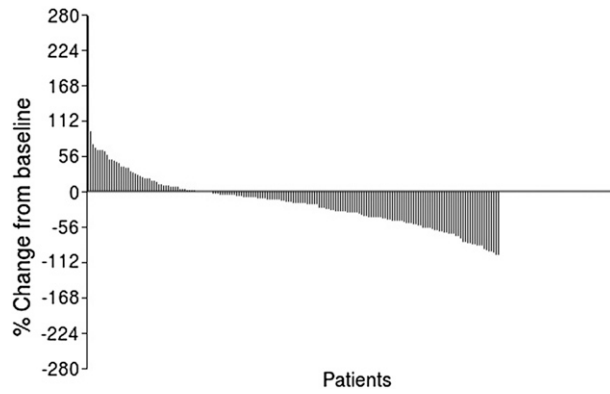

**Waterfall Plot.** Waterfall plot of the overall response measured by RECIST 1.0.



**Table 1.** Patients' characteristics (*n* = 195)

| <b>Patient characteristics</b>                                      | <b>Median</b> | <b>%</b> |
|---------------------------------------------------------------------|---------------|----------|
| Age, years, median (range)                                          | 59 (23–80)    |          |
| Sex                                                                 |               |          |
| Male                                                                | 127           | 65.1     |
| Female                                                              | 68            | 34.9     |
| Eastern Cooperative Oncology Group performance status               |               |          |
| 0                                                                   | 43            | 22.1     |
| 1                                                                   | 113           | 57.9     |
| 2                                                                   | 39            | 20.0     |
| Disease location                                                    |               |          |
| Distal part                                                         | 138           | 71.8     |
| Proximal part                                                       | 57            | 29.2     |
| Histology                                                           |               |          |
| Well or moderately differentiated                                   | 52            | 26.7     |
| Poorly differentiated<br>(signet ring cell, mucinous, undetermined) | 143           | 73.3     |
| Extent of disease                                                   |               |          |
| Locally advanced                                                    | 52            | 26.7     |
| Metastatic                                                          | 143           | 73.3     |
| Metastatic sites                                                    |               |          |
| 1                                                                   | 57            | 39.9     |
| 2                                                                   | 61            | 42.7     |
| >2                                                                  | 25            | 17.5     |
| Prior adjuvant chemotherapy                                         |               |          |
| No                                                                  | 144           | 73.8     |
| Yes                                                                 | 51            | 26.2     |

**Table 2.** Toxicity possibly, probably, or definitely attributable to chemotherapy (*n* = 195)

| Adverse events      | Grade 1–2 Toxicities |      | Grade 3–4 Toxicities |      |
|---------------------|----------------------|------|----------------------|------|
|                     | No. of patients      | %    | No. of patients      | %    |
| Hematological       |                      |      |                      |      |
| Leucopenia          | 81                   | 41.5 | 28                   | 14.4 |
| Neutropenia         | 64                   | 32.8 | 17                   | 8.8  |
| Anemia              | 27                   | 13.8 | 2                    | 1.0  |
| Thrombocytopenia    | 19                   | 9.7  | 3                    | 1.5  |
| Nonhematological    |                      |      |                      |      |
| Alopecia            | 42                   | 21.5 | 27                   | 13.8 |
| Fatigue             | 27                   | 13.8 | 14                   | 7.2  |
| Nausea/vomiting     | 57                   | 29.2 | 11                   | 5.1  |
| Hand-food syndrome  | 35                   | 17.9 | 11                   | 5.1  |
| Neurotoxicity       | 24                   | 12.3 | 8                    | 4.1  |
| Diarrhea            | 26                   | 13.3 | 7                    | 3.6  |
| Hepatic dysfunction | 21                   | 10.8 | 6                    | 3.1  |
| Stomatitis          | 13                   | 6.7  | 1                    | 0.5  |

[Click here](#) to access other published clinical trials.

---
